# Supplementary material
Source: Royal Society of Chemistry journal article supplement (doi:10.1039/d6cp00104a)
Supplement: d6cp00104a1.pdf [file d6cp00104a1.pdf]

## Supplementary Information

### Polyols-Based Deep Eutectic Solvents: Betaine *versus* Choline Chloride

Gabriel Teixeira<sup>1</sup>, Dinis O. Abranches<sup>1</sup>, Gangqiang Yu<sup>2,3</sup>, Christoph Held<sup>2</sup>, Luís M.N.B.F. Santos<sup>4</sup>, Olga Ferreira<sup>5,\*</sup>, João A. P. Coutinho<sup>1</sup>

<sup>1</sup>CICECO - Aveiro Institute of Materials, Department of Chemistry, University of Aveiro, Campus Universitário de Santiago, Aveiro, Portugal

<sup>2</sup>Laboratory of Thermodynamics, Department of Biochemical and Chemical Engineering, TU Dortmund University, Emil-Figge-Street 70, Dortmund 44227, Germany

<sup>3</sup>Faculty of Environment and Life, Beijing University of Technology, 100 Ping Le Yuan, Chaoyang District, Beijing, 100124, China

<sup>4</sup>CIQUP, Institute of Molecular Sciences (IMS), Department of Chemistry and Biochemistry, Faculty of Science, University of Porto, Rua do Campo Alegre, Porto 4169-007, Portugal

<sup>5</sup>CIMO, LA SusTEC, Instituto Politécnico de Bragança, Campus de Santa Apolónia, 5300-253 Bragança, Portugal

\*Corresponding author: [oferreira@ipb.pt](mailto:oferreira@ipb.pt)

## Figures

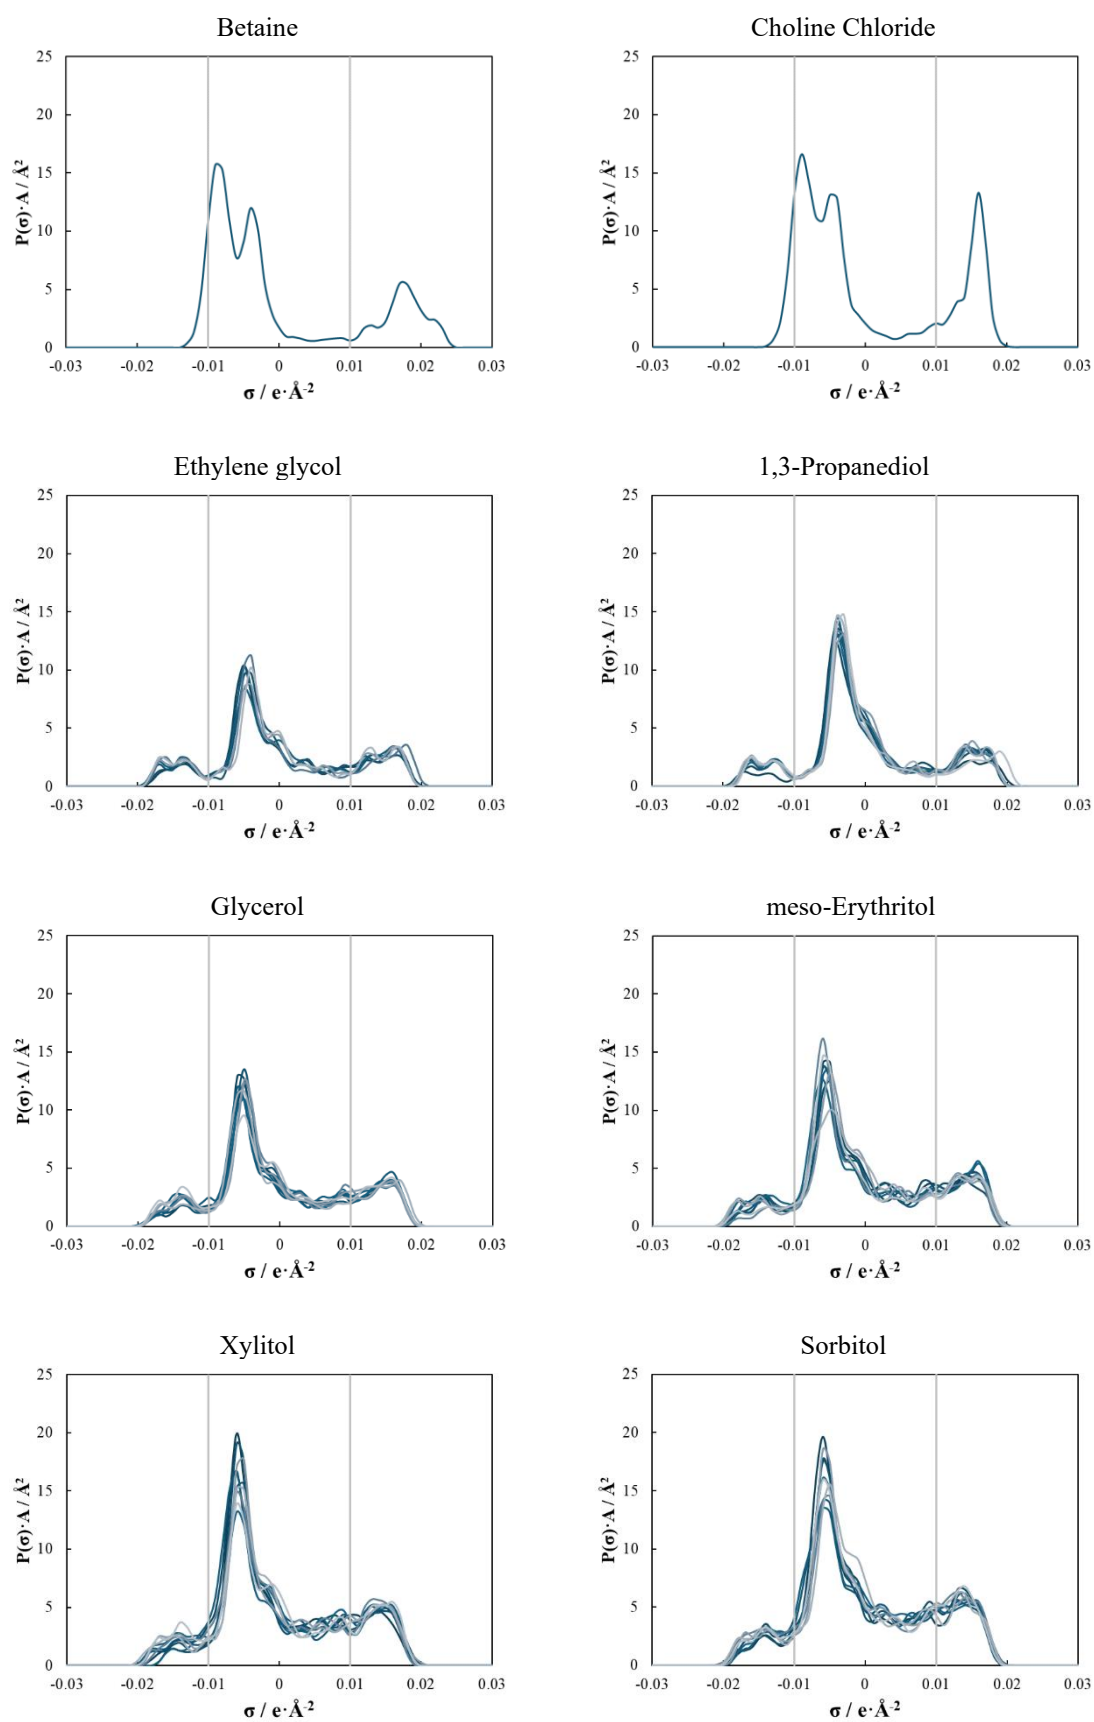

Figure S.1 - Sigma-profile using TZVP parametrization of the different conformers studied in this work.

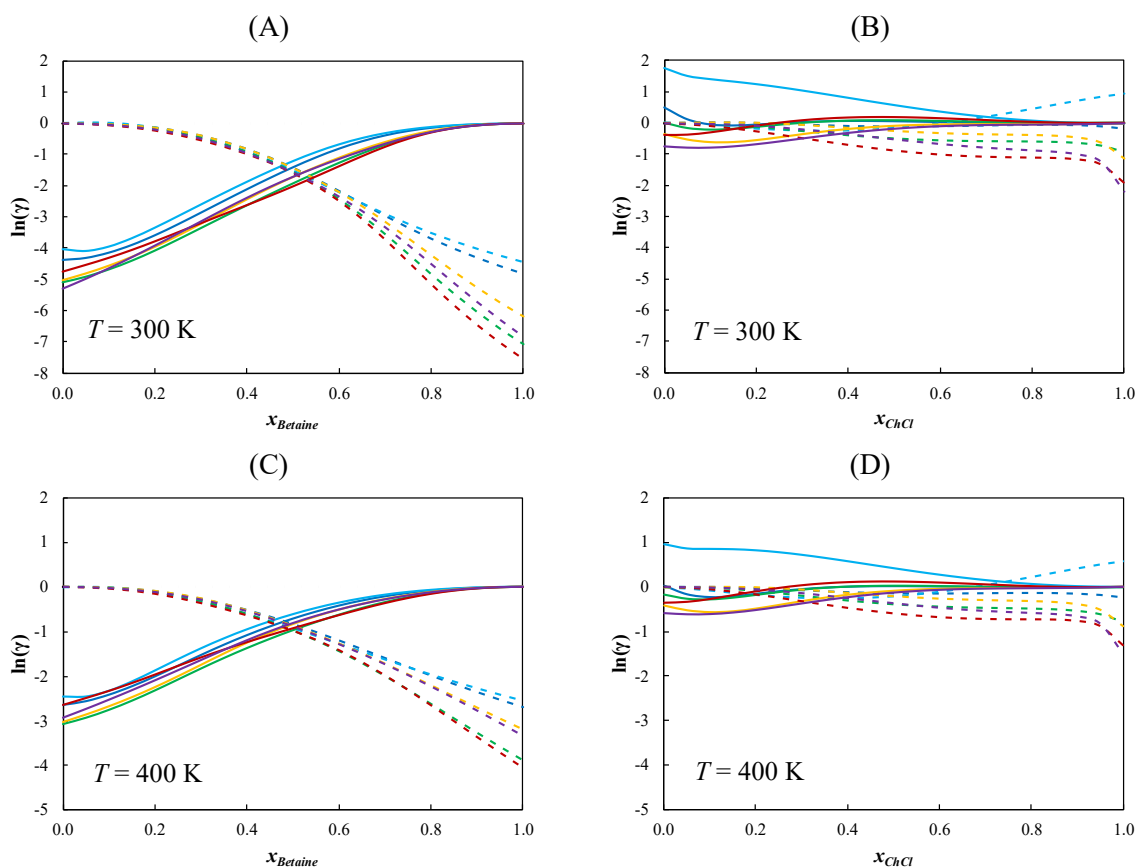

Figure S.2 - Isothermal activity coefficients predictions of COSMO-RS (TZVPD-FINE parametrisation) of the binary systems of betaine (A and C) or ChCl (B and D) with ethylene glycol (dark blue), 1,3-propanediol (light blue), glycerol (green), *meso*-erythritol (yellow), xylitol (red), and sorbitol (F) at 300 K (A and B) and 400 K (C and D). Lines represent the activity coefficients of either betaine or ChCl (solid lines), polyols (dashed lines), and  $\ln(\gamma) = 0$  (dotted line).

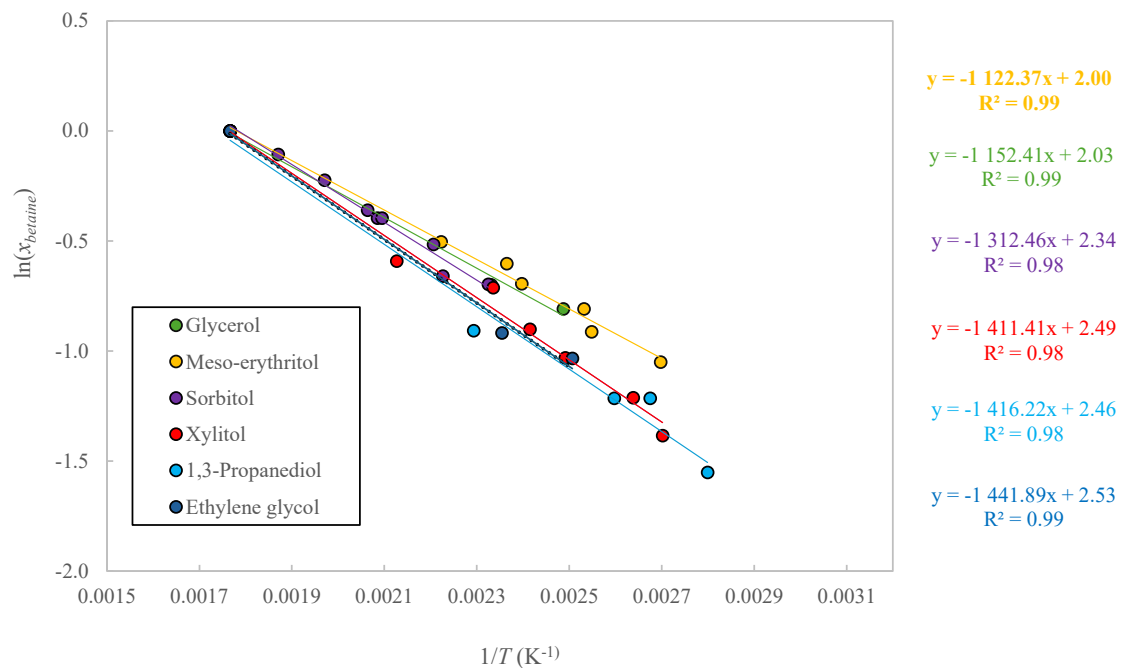

Figure S.3 – Representation of the  $\ln(x_{betaine})$  as a function of  $1/T$  of the binary mixtures of betaine and a polyol. Colour code for the polyol:  $\blacktriangle$ , 1,3-propanediol;  $\bullet$ , ethylene glycol;  $\blacklozenge$ , glycerol;  $\blacklozenge$ , *meso*-erythritol;  $\blacklozenge$ , sorbitol;  $\blacklozenge$ , xylitol. The solid lines and equations correspond to the linear fits of each system. For the linear fit, only the first data points after the pure component ( $x_{betaine} = 1$ ,  $T = T_m = 566.2$  K) were considered.

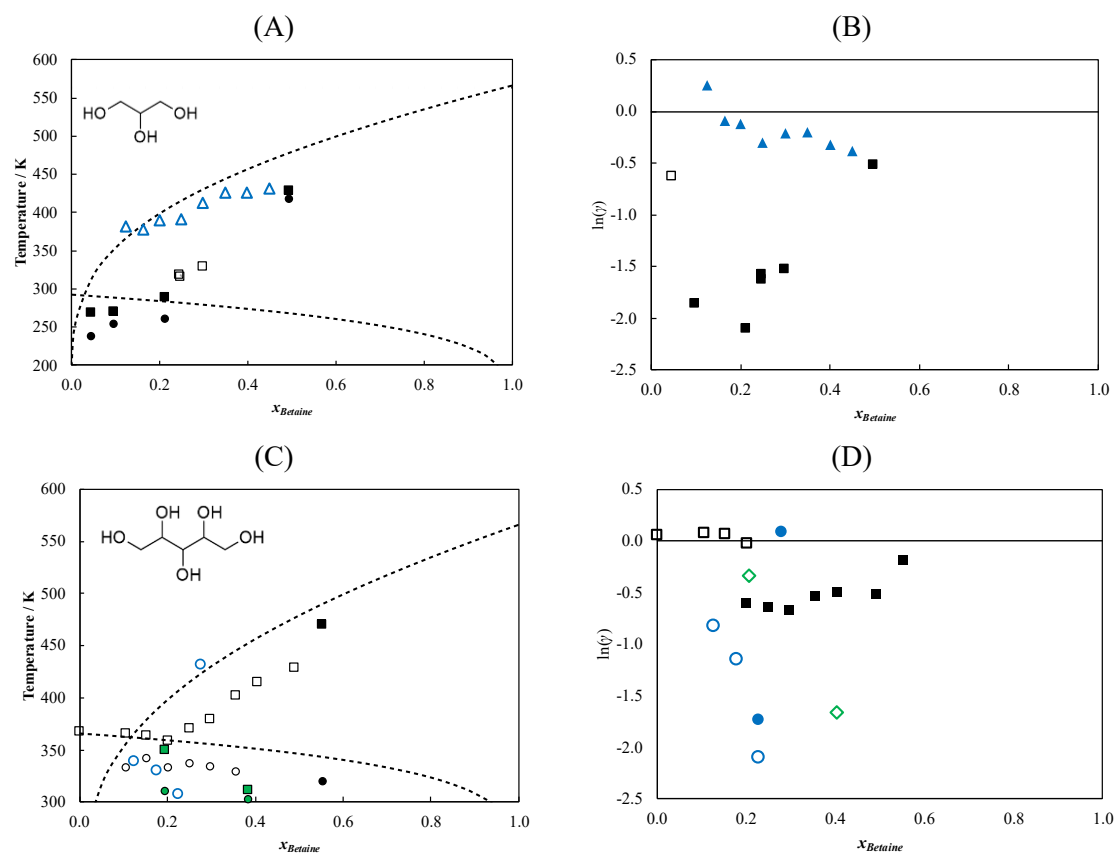

Figure S.4 - Solid-liquid phase diagrams of (A) betaine/GLY and (C) betaine/XYL, and respective non-isothermal activity coefficients (B and D). Symbols in (A) and (C) represent data of betaine systems without added water obtained by VM (white symbols) and DSC (black symbols), with 0.6 wt% of added water (green symbols), and data of betaine monohydrate systems from Zahrina et al. (blue triangles)<sup>1</sup> and Palmelund et al. (blue circles).<sup>2</sup> The  $x$ -axis is the mole fraction of betaine anhydrous. Lines in (A) and (C) represent the ideal model (dashed lines) and normal boiling temperature of GLY and in (B) and (D) represent the ideal behaviour,  $\ln(\gamma_i) = 0$ .

## Tables

Table S.1 – Experimental solid-liquid equilibrium data ( $x$ ,  $T_m$ ,  $T_{per}$ ,  $T_{eut}$ ) for the system betaine/EG. The activity coefficients ( $\gamma$ ) were obtained as per Eq. (2) using the melting properties reported in Table 1.

| $x_{\text{betaine}}$ | $T_m / \text{K}$ | $T_{per} / \text{K}$ | $T_{eut} / \text{K}$ | $\ln(\gamma_{\text{BET}})$ | $\ln(\gamma_{\text{EG}})$ | Measuring method |
|----------------------|------------------|----------------------|----------------------|----------------------------|---------------------------|------------------|
| 0.05                 | 252.8            | -                    | -                    | -                          | -0.1                      | DSC              |
| 0.09                 | 272.1            | -                    | 248.5                | -                          | -                         | DSC              |
| 0.15                 | 303.2            | -                    | -                    | -                          | -                         | Heating Block    |
| 0.19                 | 315.7            | -                    | -                    | -                          | -                         | DSC              |
| 0.25                 | 313.2            | -                    | -                    | -1.7                       | -                         | Heating Block    |
| 0.25                 | 309.8            | -                    | 265.7                | -1.8                       | -                         | DSC              |
| 0.30                 | 357.2            | 321.6                | -                    | -1.0                       | -                         | DSC              |
| 0.30                 | 348.5            | -                    | -                    | -1.2                       | -                         | Heating Block    |
| 0.36                 | 390.8            | -                    | -                    | -0.7                       | -                         | Heating Block    |
| 0.36                 | 398.9            | 328.3                | -                    | -0.6                       | -                         | DSC              |
| 0.40                 | 424.8            | -                    | -                    | -0.4                       | -                         | Heating Block    |
| 0.40                 | -                | 315.7                | -                    | -                          | -                         | DSC              |

Standard uncertainties,  $u$ , are  $u_i(x) = 0.01$ , for the temperatures measured by the heating block  $u(T) = 2$  K, and by DSC  $u(T) = 1$  K.

Table S.2 – Experimental solid-liquid equilibrium data ( $x$ ,  $T_m$ ,  $T_{tr}$ ,  $T_{eut}$ ) for the system betaine/13PG. The activity coefficients ( $\gamma$ ) were obtained as per Eq. (2) using the melting properties reported in Table 1.

| $x_{\text{betaine}}$ | $T_m / \text{K}$ | $T_{tr} / \text{K}$ | $T_{eut} / \text{K}$ | $\ln(\gamma_{\text{BET}})$ | $\ln(\gamma_{\text{13PG}})$ | Measuring method |
|----------------------|------------------|---------------------|----------------------|----------------------------|-----------------------------|------------------|
| 0.05                 | 266.4            | -                   | 243.2                | -1.4                       | 0.4                         | DSC              |
| 0.21                 | 357.2            | 345.9               | -                    | -0.7                       | -                           | DSC              |
| 0.30                 | 373.8            | -                   | -                    | -0.8                       | -                           | Heating Block    |
| 0.30                 | 385.0            | 366.7               | -                    | -0.6                       | -                           | DSC              |
| 0.40                 | 436.2            | -                   | -                    | -0.2                       | -                           | Heating Block    |

Standard uncertainties,  $u$ , are  $u_i(x) = 0.01$ , for the temperatures measured by the heating block  $u(T) = 2$  K, and by DSC  $u(T) = 1$  K.

Table S.3 – Experimental solid-liquid equilibrium data ( $x$ ,  $T_m$ ,  $T_{tr}$ ,  $T_{eut}$ ) for the system betaine/GLY. The activity coefficients ( $\gamma$ ) were obtained as per Eq. (2) using the melting properties reported in Table 1.

| $x_{\text{betaine}}$ | $T_m / \text{K}$ | $T_{tr} / \text{K}$ | $T_{eut} / \text{K}$ | $\ln(\gamma_{\text{BET}})$ | $\ln(\gamma_{\text{GLY}})$ | Measuring method |
|----------------------|------------------|---------------------|----------------------|----------------------------|----------------------------|------------------|
| 0.05                 | 268.8            | -                   | -                    | -                          | -0.6                       | DSC              |
| 0.10                 | 270.1            | -                   | 253.9                | -1.9                       | -                          | DSC              |
| 0.21                 | 289.7            | -                   | 261.5                | -2.1                       | -                          | DSC              |
| 0.25                 | 317.2            | -                   | -                    | -1.6                       | -                          | Heating Block    |
| 0.30                 | 330.2            | -                   | -                    | -1.5                       | -                          | Heating Block    |
| 0.50                 | 429.0            | 418.7               | -                    | -0.5                       | -                          | DSC              |

Standard uncertainties,  $u$ , are  $u_i(x) = 0.01$ , for the temperatures measured by the heating block  $u(T) = 2$  K, and by DSC  $u(T) = 1$  K.

Table S.4 – Experimental solid-liquid equilibrium data ( $x$ ,  $T_m$ ,  $T_{eut}$ ) for the system betaine/ME. The activity coefficients ( $\gamma$ ) were obtained as per Eq. (2) using the melting properties reported in Table 1.

| $x_{\text{betaine}}$ | $T_m / \text{K}$ | $T_{eut} / \text{K}$ | $\ln(\gamma_{\text{BET}})$ | $\ln(\gamma_{\text{ME}})$ | Measuring method |
|----------------------|------------------|----------------------|----------------------------|---------------------------|------------------|
| 0.09                 | 386.9            | -                    | -                          | 0.0                       | Visual Method    |
| 0.15                 | 385.2            | 367.9                | -                          | 0.0                       | Visual Method    |
| 0.18                 | 375.7            | -                    | -                          | -0.3                      | Visual Method    |
| 0.25                 | 370.4            | 367.5                | -                          | -0.4                      | Visual Method    |
| 0.30                 | 374.6            | -                    | -                          | -0.2                      | Visual Method    |
| 0.35                 | 370.7            | -                    | -                          | -0.2                      | Visual Method    |
| 0.40                 | -                | 363.3                | -1.2                       | -0.4                      | Visual Method    |
| 0.45                 | 380.3            | -                    | -1.1                       | -                         | Visual Method    |
| 0.50                 | 394.7            | -                    | -1.0                       | -                         | Visual Method    |
| 0.55                 | 422.9            | -                    | -0.7                       | -                         | Visual Method    |
| 0.60                 | 449.9            | -                    | -0.5                       | -                         | Visual Method    |

Standard uncertainties,  $u$ , are  $u_i(x) = 0.01$ , for the temperatures measured by the visual method:  $u(T) = 2$  K.

Table S.5 – Experimental solid-liquid equilibrium data ( $x$ ,  $T_m$ ,  $T_{cut}$ ) for the system betaine/XYL. The activity coefficients ( $\gamma$ ) were obtained as per Eq. (2) using the melting properties reported in Table 1.

| $x_{\text{betaine}}$ | $T_m / \text{K}$ | $T_{cut} / \text{K}$ | $\ln(\gamma_{\text{BET}})$ | $\ln(\gamma_{\text{XYL}})$ | Measuring method |
|----------------------|------------------|----------------------|----------------------------|----------------------------|------------------|
| 0.11                 | 364.8            | 332.3                | -                          | 0.1                        | Visual Method    |
| 0.15                 | 363.0            | 341.2                | -                          | 0.1                        | Visual Method    |
| 0.20                 | 358.5            | 333.2                | -0.6                       | 0.0                        | Visual Method    |
| 0.25                 | 370.1            | 337.2                | -0.6                       | -                          | Visual Method    |
| 0.30                 | 379.1            | 334.2                | -0.7                       | -                          | Visual Method    |
| 0.36                 | 401.4            | 329.2                | -0.5                       | -                          | Visual Method    |
| 0.41                 | 414.2            | -                    | -0.5                       | -                          | Visual Method    |
| 0.49                 | 428.3            | -                    | -0.5                       | -                          | Visual Method    |
| 0.55                 | 470.2            | 320.1                | -0.2                       | -                          | DSC              |

Standard uncertainties,  $u$ , are  $u_t(x) = 0.01$ , for the temperatures measured by the Visual Method  $u(T) = 2$  K, and by DSC  $u(T) = 1$  K.

Table S.6 – Experimental solid-liquid equilibrium data ( $x$ ,  $w$ ,  $T_m$ ,  $T_{cut}$ ) for the system betaine/XYL/water. The activity coefficients ( $\gamma$ ) were obtained as per Eq. (2) using the melting properties reported in Table 1.

| $x_{\text{betaine}}$ | $x_{\text{water}}$ | $w_{\text{water}}$ | $T_m / \text{K}$ | $T_{cut} / \text{K}$ | $\ln(\gamma_{\text{XYL}})$ | Measuring method |
|----------------------|--------------------|--------------------|------------------|----------------------|----------------------------|------------------|
| 0.38                 | 0.05               | 0.006              | 310.7            | 302.6                | -1.7                       | DSC              |
| 0.20                 | 0.04               | 0.006              | 349.6            | 310.0                | -0.3                       | DSC              |
| 0.36                 | 0.11               | 0.016              | 353.1            | 312.6                | -                          | DSC              |

Standard uncertainties,  $u$ , are  $u_t(x) < 10^{-5}$  and  $u_t(w) = 0.002$ , and for the temperatures measured by DSC  $u(T) = 1$  K.

## References

- 1 I. Zahrina, M. Nasikin, K. Mulia, M. Prajanto and A. Yanuar, Molecular interactions between betaine monohydrate-glycerol deep eutectic solvents and palmitic acid: Computational and experimental studies, *J Mol Liq*, 2018, 251, 28–34.
- 2 H. Palmelund, B. J. Boyd, J. Rantanen and K. Löbmann, Influence of water of crystallization on the ternary phase behavior of a drug and deep eutectic solvent, *J Mol Liq*, 2020, 315, 113727.
